# Supplementary material for: Gene set analyses for interpreting microarray experiments on prokaryotic organisms
Source: PubMed Central journal article supplement (PMC2587482; doi:10.1186/1471-2105-9-469), 2008-11-05
Supplement: 1471-2105-9-469-S1.pdf [file 1471-2105-9-469-S1.pdf]

## Supplemental Table 1

### Table of p-values of gene sets picked up as significant by FET 1, FET ½, ABSSUM-NR, SUM-NR or MAXMEAN-NR\*

Note: p-values are bold and italicized if they are significant at the  $\alpha=0.0002$  level. Q1, Med and Q3 correspond to the 25<sup>th</sup> percentile, median and 75<sup>th</sup> percentile, respectively, of the log-ratios of gene expression scores of genes in that set and are meant as an indication of whether a set is up/down-regulated or a combination of both.

|                                       | Setsize | FET 1<br>(p-value)        | FET ½<br>(p-value)        | ABS-<br>SUM-NR<br>(p-value) | SUM-NR<br>(p-value)       | MAXMEAN-<br>NR (p-value)  | Q1    | Med   | Q3    |
|---------------------------------------|---------|---------------------------|---------------------------|-----------------------------|---------------------------|---------------------------|-------|-------|-------|
| <b>Acetyl Phosphate</b>               |         |                           |                           |                             |                           |                           |       |       |       |
| <b>Expt 1</b>                         |         |                           |                           |                             |                           |                           |       |       |       |
| Serine-glyoxylate cycle               | 28      | 0.03208                   | 0.00478                   | <b><i>0.00010</i></b>       | 0.00024                   | <b><i>0.00018</i></b>     | 0.03  | 0.30  | 0.82  |
| Translation factors bacterial         | 24      | 0.00060                   | 0.00366                   | <b><i>0.00006</i></b>       | 0.01324                   | 0.00082                   | -0.01 | 0.44  | 0.83  |
| Bacterial Cell Division               | 26      | 0.23717                   | <b><i>&lt;0.00002</i></b> | 0.00090                     | 0.01528                   | 0.00236                   | 0.01  | 0.47  | 0.71  |
| Bacterial Cytoskeleton                | 21      | 0.15259                   | <b><i>0.00018</i></b>     | 0.00096                     | 0.04720                   | 0.00520                   | 0.00  | 0.43  | 0.77  |
| F0F1-type ATP synthesis               | 9       | 0.00170                   | <b><i>0.00002</i></b>     | <b><i>&lt;0.00002</i></b>   | <b><i>&lt;0.00002</i></b> | <b><i>&lt;0.00002</i></b> | 0.78  | 0.99  | 1.44  |
| Ribosome SSU Bacterial                | 22      | <b><i>&lt;0.00002</i></b> | <b><i>&lt;0.00002</i></b> | <b><i>&lt;0.00002</i></b>   | <b><i>&lt;0.00002</i></b> | <b><i>&lt;0.00002</i></b> | 0.60  | 0.92  | 1.11  |
| Ribosome LSU Bacterial                | 34      | <b><i>&lt;0.00002</i></b> | <b><i>&lt;0.00002</i></b> | <b><i>&lt;0.00002</i></b>   | <b><i>&lt;0.00002</i></b> | <b><i>&lt;0.00002</i></b> | 0.16  | 0.89  | 1.16  |
| Dihydrogenase complexes               | 15      | 0.00022                   | <b><i>&lt;0.00002</i></b> | <b><i>&lt;0.00002</i></b>   | <b><i>&lt;0.00002</i></b> | <b><i>&lt;0.00002</i></b> | 0.51  | 0.82  | 1.70  |
| TCA Cycle                             | 22      | <b><i>0.00004</i></b>     | 0.00033                   | <b><i>&lt;0.00002</i></b>   | <b><i>&lt;0.00002</i></b> | <b><i>&lt;0.00002</i></b> | 0.09  | 0.56  | 1.83  |
| Emben-Meyerhof and<br>Gluconeogenesis | 19      | 0.03121                   | 0.00152                   | 0.00152                     | <b><i>&lt;0.00002</i></b> | <b><i>&lt;0.00002</i></b> | 0.22  | 0.58  | 0.85  |
| General Secretion Pathway             | 15      | 0.63593                   | 0.06042                   | 0.22486                     | <b><i>0.00012</i></b>     | 0.01294                   | -0.62 | -0.41 | -0.01 |
| Terminal cytochrome<br>oxidases       | 10      | 0.02319                   | 0.03247                   | 0.00380                     | 0.00084                   | <b><i>0.00012</i></b>     | 0.25  | 0.52  | 1.06  |
| tRNA aminocyclation                   | 23      | 0.05823                   | 0.00241                   | 0.00352                     | 0.00048                   | <b><i>0.00010</i></b>     | 0.19  | 0.47  | 0.85  |
| Universal GTPases                     | 16      | 0.00270                   | 0.00114                   | 0.00040                     | <b><i>&lt;0.00002</i></b> | <b><i>&lt;0.00002</i></b> | 0.27  | 0.56  | 1.29  |

|                               | Setsize | FET 1<br>(p-value) | FET ½<br>(p-value) | ABS-<br>SUM-NR<br>(p-value) | SUM-NR<br>(p-value) | MAXMEAN-<br>NR (p-value) | Q1    | Med   | Q3    |
|-------------------------------|---------|--------------------|--------------------|-----------------------------|---------------------|--------------------------|-------|-------|-------|
| <b>Acetyl Phosphate</b>       |         |                    |                    |                             |                     |                          |       |       |       |
| <b>Expt 2</b>                 |         |                    |                    |                             |                     |                          |       |       |       |
| Lipoic acid metabolism        | 6       | 0.00759            | 0.00401            | <b>0.00016</b>              | 0.00036             | 0.00056                  | -1.00 | -0.93 | -0.52 |
| TCA Cycle                     | 22      | 0.01372            | 0.00608            | <b>0.00012</b>              | 0.00024             | 0.00040                  | -0.86 | -0.32 | -0.09 |
| tRNA aminoacylation           | 23      | 0.41951            | 0.00042            | <b>0.00008</b>              | <b>0.00004</b>      | <b>0.00006</b>           | -0.79 | -0.37 | -0.16 |
| Universal GPTases             | 16      | 0.00041            | 0.00308            | < <b>0.00002</b>            | < <b>0.00002</b>    | < <b>0.00002</b>         | -0.92 | -0.40 | -0.26 |
| Glycine cleavage system       | 8       | 1.00000            | <b>0.00013</b>     | 0.00048                     | 0.0004              | <b>0.00014</b>           | -0.84 | -0.64 | -0.26 |
| Dehydrogenase complexes       | 15      | 0.00031            | <b>0.00003</b>     | < <b>0.00002</b>            | < <b>0.00002</b>    | < <b>0.00002</b>         | -1.01 | -0.64 | -0.39 |
| NusA-TFII Cluster             | 4       | <b>0.00015</b>     | 0.00894            | <b>0.00008</b>              | 0.04784             | 0.0485                   | -1.53 | -0.68 | 0.36  |
| RNA polymerase bacterial      | 4       | <b>0.00015</b>     | 0.00894            | <b>0.00004</b>              | <b>0.00012</b>      | <b>0.00006</b>           | -1.39 | -1.24 | -0.99 |
| Translation factors bacterial | 24      | < <b>0.00002</b>   | 0.00064            | < <b>0.00002</b>            | < <b>0.00002</b>    | <b>0.00002</b>           | -1.14 | -0.30 | -0.06 |
| F0F1-type-ATP-synthase        | 9       | < <b>0.00002</b>   | < <b>0.00002</b>   | < <b>0.00002</b>            | < <b>0.00002</b>    | < <b>0.00002</b>         | -1.25 | -1.02 | -0.81 |
| Colanic Acid Biosynthesis     | 17      | 0.33083            | 0.69291            | 0.51186                     | < <b>0.00002</b>    | 0.30378                  | 0.00  | 0.10  | 0.29  |
| Ribosome SSU Bacterial        | 22      | < <b>0.00002</b>   | < <b>0.00002</b>   | < <b>0.00002</b>            | < <b>0.00002</b>    | < <b>0.00002</b>         | -1.29 | -1.00 | -0.87 |
| Ribosome LSU Bacterial        | 34      | < <b>0.00002</b>   | < <b>0.00002</b>   | < <b>0.00002</b>            | < <b>0.00002</b>    | < <b>0.00002</b>         | -1.19 | -0.99 | -0.67 |
| <b>Expt 3</b>                 |         |                    |                    |                             |                     |                          |       |       |       |
| Bacterial Chemotaxis          | 19      | 0.12507            | < <b>0.00002</b>   | <b>0.00016</b>              | < <b>0.00002</b>    | < <b>0.00002</b>         | -0.70 | -0.27 | -0.10 |
| Flagellum                     | 45      | < <b>0.00002</b>   | < <b>0.00002</b>   | < <b>0.00002</b>            | < <b>0.00002</b>    | < <b>0.00002</b>         | -0.74 | -0.35 | 0.00  |
| Ribosome LSU Bacterial        | 34      | 1.00000            | 0.04811            | 0.01356                     | < <b>0.00002</b>    | <b>0.00012</b>           | -0.26 | -0.15 | -0.06 |
| <b>Expt 4</b>                 |         |                    |                    |                             |                     |                          |       |       |       |
| Dehydrogenase complexes       | 15      | 0.02276            | <b>0.00016</b>     | 0.00646                     | 0.00184             | <b>0.00014</b>           | 0.17  | 0.23  | 0.57  |
| TCA Cycle                     | 22      | <b>0.00002</b>     | 0.00042            | 0.00106                     | <b>0.00004</b>      | <b>0.00002</b>           | 0.07  | 0.24  | 0.83  |
| Ribosome LSU Bacterial        | 34      | 0.42037            | 0.18754            | 0.01662                     | 0.00020             | 0.00562                  | -0.39 | -0.15 | 0.10  |

|                                       | Setsize | FET 1<br>(p-value) | FET ½<br>(p-value) | ABS-<br>SUM-NR<br>(p-value) | SUM-NR<br>(p-value) | MAXME<br>AN-NR<br>(p-value) | Q1    | Med   | Q3    |
|---------------------------------------|---------|--------------------|--------------------|-----------------------------|---------------------|-----------------------------|-------|-------|-------|
| <b>Acetyl Phosphate</b>               |         |                    |                    |                             |                     |                             |       |       |       |
| <b>Expt 5</b>                         |         |                    |                    |                             |                     |                             |       |       |       |
| Bacterial Cell Division               | 26      | 0.02978            | 0.00096            | <b>0.00018</b>              | 0.00584             | 0.00052                     | -0.69 | -0.40 | -0.16 |
| Translation factors<br>bacterial      | 24      | 0.00033            | 0.00042            | <b>0.00002</b>              | 0.00092             | <b>0.00012</b>              | -0.85 | -0.35 | -0.13 |
| Bacterial Cytoskeleton                | 21      | 0.10441            | <b>0.00009</b>     | 0.00062                     | 0.08624             | 0.01852                     | -0.69 | -0.34 | -0.03 |
| Dehydrogenase<br>complexes            | 15      | 0.33039            | < <b>0.00002</b>   | 0.00024                     | <b>0.00008</b>      | <b>0.00014</b>              | -0.82 | -0.62 | -0.43 |
| NusA-TFII Cluster                     | 4       | <b>0.00007</b>     | 0.01318            | 0.00116                     | 0.24188             | 0.02556                     | -1.33 | -0.68 | 0.28  |
| RNA polymerase<br>bacterial           | 4       | <b>0.00007</b>     | 0.01318            | 0.00096                     | <b>0.00008</b>      | <b>0.00004</b>              | -1.26 | -1.20 | -0.99 |
| Flagellum                             | 45      | < <b>0.00002</b>   | 0.00022            | < <b>0.00002</b>            | < <b>0.00002</b>    | 0.00040                     | 0.00  | 0.24  | 0.72  |
| F0F1-type ATP<br>synthase             | 9       | <b>0.00005</b>     | < <b>0.00002</b>   | <b>0.00002</b>              | < <b>0.00002</b>    | < <b>0.00002</b>            | -1.32 | -0.83 | -0.64 |
| Ribosome SSU<br>bacterial             | 22      | < <b>0.00002</b>   | < <b>0.00002</b>   | < <b>0.00002</b>            | < <b>0.00002</b>    | < <b>0.00002</b>            | -1.04 | -0.87 | -0.74 |
| Ribosome LSU<br>bacterial             | 34      | < <b>0.00002</b>   | < <b>0.00002</b>   | < <b>0.00002</b>            | < <b>0.00002</b>    | < <b>0.00002</b>            | -1.06 | -0.79 | -0.50 |
| Bacterial Chemotaxis                  | 19      | 1.00000            | 0.16028            | 0.28602                     | <b>0.00004</b>      | 0.23144                     | 0.02  | 0.19  | 0.49  |
| Emden-Meyerhof<br>and Gluconeogenesis | 19      | 0.39846            | 0.01929            | 0.00624                     | 0.00048             | <b>0.00012</b>              | -0.67 | -0.36 | -0.17 |
| Universal GTPases                     | 16      | 0.0649             | 0.02728            | 0.00138                     | 0.00032             | <b>0.00018</b>              | -0.84 | -0.40 | -0.23 |

|                                                | Setsize | FET 1<br>(p-value) | FET ½<br>(p-value) | ABS-<br>SUM-NR<br>(p-value) | SUM-NR<br>(p-value) | MAXME<br>AN-NR<br>(p-value) | Q1    | Med   | Q3    |
|------------------------------------------------|---------|--------------------|--------------------|-----------------------------|---------------------|-----------------------------|-------|-------|-------|
| <b>Acetyl Phosphate</b>                        |         |                    |                    |                             |                     |                             |       |       |       |
| <b>Expt 6</b>                                  |         |                    |                    |                             |                     |                             |       |       |       |
| Dehydrogenase<br>complexes                     | 15      | 0.00073            | 0.00020            | 0.00262                     | <b>0.00004</b>      | <b>&lt;0.00002</b>          | 0.09  | 0.28  | 0.74  |
| Protein chaperones                             | 7       | <b>0.00006</b>     | 0.02132            | 0.00398                     | 0.00432             | 0.00036                     | 0.12  | 0.28  | 1.28  |
| Flagellum                                      | 45      | <b>&lt;0.00002</b> | <b>0.00015</b>     | <b>&lt;0.00002</b>          | <b>&lt;0.00002</b>  | <b>&lt;0.00002</b>          | -0.02 | 0.21  | 0.56  |
| TCA Cycle                                      | 22      | <b>&lt;0.00002</b> | <b>0.00008</b>     | <b>0.00010</b>              | <b>&lt;0.00002</b>  | <b>&lt;0.00002</b>          | 0.01  | 0.10  | 1.20  |
| <b>Sugar Acids</b>                             |         |                    |                    |                             |                     |                             |       |       |       |
| <b>Expt 1</b>                                  |         |                    |                    |                             |                     |                             |       |       |       |
| Ribosome LSU<br>Bacterial                      | 34      | 0.00132            | 0.08022            | <b>0.00008</b>              | <b>0.00004</b>      | <b>0.00002</b>              | -0.24 | 0.11  | 0.28  |
| D-Gluconate and<br>Ketogluconate<br>metabolism | 19      | 0.18189            | 0.50054            | 0.06424                     | <b>0.00012</b>      | 0.00144                     | -0.18 | -0.07 | 0.02  |
| Leucine Biosynthesis                           | 7       | 0.04050            | 0.01794            | 0.00090                     | 0.00020             | <b>0.00004</b>              | -0.37 | -0.04 | -0.02 |
| Translation factors<br>bacterial               | 24      | 0.00111            | 0.00671            | 0.00392                     | 0.00048             | <b>0.00010</b>              | -0.11 | -0.01 | 0.15  |
| <b>Expt 2</b>                                  |         |                    |                    |                             |                     |                             |       |       |       |
| Translation factors<br>bacterial               | 24      | <b>0.00014</b>     | 0.00466            | 0.00052                     |                     |                             | -1.06 | -0.61 | -0.04 |
| Ribosome LSU<br>bacterial                      | 34      | <b>0.00004</b>     | 0.00480            | <b>&lt;0.00002</b>          |                     |                             | -1.28 | -0.46 | 0.23  |

|                                          | Setsize | FET 1<br>(p-value) | FET ½<br>(p-value) | ABS-<br>SUM-NR<br>(p-value) | SUM-NR<br>(p-value) | MAXME<br>AN-NR<br>(p-value) | Q1    | Med   | Q3    |
|------------------------------------------|---------|--------------------|--------------------|-----------------------------|---------------------|-----------------------------|-------|-------|-------|
| <b>Sugar Acids</b>                       |         |                    |                    |                             |                     |                             |       |       |       |
| <b>Expt 3</b>                            |         |                    |                    |                             |                     |                             |       |       |       |
| D-Gluconate and Ketogluconate metabolism | 19      | <b>0.00002</b>     | 0.00052            | <b>&lt;0.00002</b>          | <b>&lt;0.00002</b>  | <b>&lt;0.00002</b>          | 0.43  | 0.61  | 1.30  |
| Branched-Chain Amino Acid Biosynthesis   | 16      | 0.18975            | 0.74433            | 0.24832                     | 0.00004             | 0.02708                     | -0.53 | -0.33 | -0.21 |
| Ribosome LSU Bacterial                   | 34      | 0.08792            | 0.17889            | 0.02608                     | <b>&lt;0.00002</b>  | 0.2958                      | -0.53 | -0.22 | 0.18  |
| <b>Expt 4</b>                            |         |                    |                    |                             |                     |                             |       |       |       |
| D-Gluconate and Ketogluconate metabolism | 19      | 0.02818            | 0.12642            | <b>&lt;0.00002</b>          | <b>&lt;0.00002</b>  | <b>&lt;0.00002</b>          | 0.38  | 0.57  | 1.54  |
| <b>Salmonella Experiments</b>            |         |                    |                    |                             |                     |                             |       |       |       |
| <b>LB Log hfg</b>                        |         |                    |                    |                             |                     |                             |       |       |       |
| Nitrate and nitrite ammonification       | 30      | <b>0.00003</b>     | <b>&lt;0.00002</b> | <b>&lt;0.00002</b>          | <b>&lt;0.00002</b>  | <b>&lt;0.00002</b>          | 0.29  | 0.60  | 0.91  |
| Flagellum                                | 44      | <b>&lt;0.00002</b> | <b>&lt;0.00002</b> | <b>&lt;0.00002</b>          | <b>&lt;0.00002</b>  | <b>&lt;0.00002</b>          | -0.92 | -0.60 | -0.19 |
| SPI 1                                    | 48      | <b>&lt;0.00002</b> | <b>&lt;0.00002</b> | <b>&lt;0.00002</b>          | <b>&lt;0.00002</b>  | <b>&lt;0.00002</b>          | -1.11 | -0.53 | -0.24 |
| SPI 4                                    | 6       | <b>&lt;0.00002</b> | <b>0.00019</b>     | 0.00036                     | 0.00020             | <b>0.00006</b>              | -1.52 | -1.14 | -0.85 |
| SPI 5                                    | 8       | 0.02418            | 0.07280            | <b>0.00012</b>              | <b>0.00004</b>      | <b>0.00002</b>              | -3.99 | -1.54 | -0.21 |
| Propanedial Utilization                  | 25      | 0.04202            | 0.01063            | 0.00290                     | <b>&lt;0.00002</b>  | <b>0.00006</b>              | 0.06  | 0.26  | 0.57  |

|                                               | Setsize | FET 1<br>(p-value) | FET ½<br>(p-value) | ABS-<br>SUM-NR<br>(p-value) | SUM-NR<br>(p-value) | MAXME<br>AN-NR<br>(p-value) | Q1    | Med   | Q3    |
|-----------------------------------------------|---------|--------------------|--------------------|-----------------------------|---------------------|-----------------------------|-------|-------|-------|
| <b>Salmonella<br/>Experiments</b>             |         |                    |                    |                             |                     |                             |       |       |       |
| <b>LB Log <i>smgB</i></b>                     |         |                    |                    |                             |                     |                             |       |       |       |
| Threonine anaerobic<br>catabolism             | 15      | 0.05296            | 0.33093            | 0.02794                     | <b>0.00016</b>      | 0.00350                     | -0.05 | 0.24  | 0.75  |
| tRNA aminoylation                             | 23      | 0.39153            | 0.1067             | 0.10576                     | < <b>0.00002</b>    | 0.00048                     | 0.09  | 0.43  | 0.74  |
| DNA structural<br>proteins, bacterial         | 7       | 0.00576            | 0.01407            | <b>0.00014</b>              | < <b>0.00002</b>    | 0.00024                     | -1.87 | -0.92 | -0.40 |
| Ribosome LSU<br>Bacterial                     | 35      | < <b>0.00002</b>   | < <b>0.00002</b>   | < <b>0.00002</b>            | 0.05632             | 0.00050                     | -1.25 | -0.15 | 0.78  |
| Ribosome SSU<br>Bacterial                     | 22      | < <b>0.00002</b>   | < <b>0.00002</b>   | < <b>0.00002</b>            | 0.00276             | 0.00236                     | -0.48 | 0.12  | 1.10  |
| <b>LB stat <i>hfq</i></b>                     |         |                    |                    |                             |                     |                             |       |       |       |
| Phage shock protein<br>(psp) operon           | 6       | < <b>0.00002</b>   | 0.00285            | <b>0.00018</b>              | < <b>0.00002</b>    | < <b>0.00002</b>            | 1.17  | 1.49  | 1.60  |
| Conjugative Transfer                          | 32      | 0.80206            | 0.28579            | 0.20766                     | < <b>0.00002</b>    | <b>0.00016</b>              | 0.19  | 0.33  | 0.56  |
| Ribosome LSU<br>Bacterial                     | 35      | < <b>0.00002</b>   | < <b>0.00002</b>   | < <b>0.00002</b>            | < <b>0.00002</b>    | < <b>0.00002</b>            | -1.48 | -0.86 | -0.52 |
| Ribosome SSU<br>Bacterial                     | 22      | < <b>0.00002</b>   | <b>0.00004</b>     | < <b>0.00002</b>            | < <b>0.00002</b>    | < <b>0.00002</b>            | -1.35 | -0.92 | -0.30 |
| Type IV secretion and<br>conjugative transfer | 33      | 0.81186            | 0.23043            | 0.25032                     | < <b>0.00002</b>    | <b>0.00016</b>              | 0.18  | 0.32  | 0.55  |
| SPI 2                                         | 44      | 0.00511            | 0.01173            | 0.00354                     | < <b>0.00002</b>    | < <b>0.00002</b>            | 0.03  | 0.30  | 0.67  |
| <b>LB Stat <i>smgB</i></b>                    |         |                    |                    |                             |                     |                             |       |       |       |
| Ribosome LSU<br>Bacterial                     | 35      | 0.01856            | <b>0.00011</b>     | 0.00122                     | 0.00492             | 0.00068                     | -0.64 | -0.20 | 0.08  |
| Phosphonate<br>Metabolism                     | 7       | 1.00000            | 0.30401            | 0.03650                     | <b>0.00012</b>      | 0.00248                     | 0.30  | 0.37  | 0.66  |

|                                                  | Setsize | FET 1<br>(p-value) | FET ½<br>(p-value) | ABS-<br>SUM-NR<br>(p-value) | SUM-NR<br>(p-value) | MAXME<br>AN-NR<br>(p-value) | Q1    | Med   | Q3    |
|--------------------------------------------------|---------|--------------------|--------------------|-----------------------------|---------------------|-----------------------------|-------|-------|-------|
| <b>Salmonella Experiments</b>                    |         |                    |                    |                             |                     |                             |       |       |       |
| <b>MgM1:100 hfq</b>                              |         |                    |                    |                             |                     |                             |       |       |       |
| DNA structural proteins, bacterial               | 7       | 0.00039            | 0.06534            | <b>0.00010</b>              | < <b>0.00002</b>    | < <b>0.00002</b>            | -1.97 | -1.09 | -0.19 |
| Ribosome SSU Bacterial                           | 22      | < <b>0.00002</b>   | <b>0.00002</b>     | < <b>0.00002</b>            | < <b>0.00002</b>    | < <b>0.00002</b>            | -1.42 | -1.11 | -0.20 |
| Ribosome LSU Bacterial                           | 35      | < <b>0.00002</b>   | < <b>0.00002</b>   | < <b>0.00002</b>            | < <b>0.00002</b>    | < <b>0.00002</b>            | -1.80 | -0.94 | -0.13 |
| SPI 2                                            | 44      | < <b>0.00002</b>   | < <b>0.00002</b>   | < <b>0.00002</b>            | 0.10220             | 0.00118                     | -0.44 | 0.31  | 0.70  |
| Conjugative Transfer                             | 32      | 0.58375            | 0.06877            | 0.21252                     | < <b>0.00002</b>    | 0.00070                     | 0.11  | 0.37  | 0.60  |
| Type IV secretion and conjugative transfer       | 33      | 0.60074            | 0.08498            | 0.24770                     | < <b>0.00002</b>    | 0.00178                     | 0.09  | 0.37  | 0.60  |
| <b>MgM1:100 smpB</b>                             |         |                    |                    |                             |                     |                             |       |       |       |
| Ribosome SSU Bacterial                           | 22      | < <b>0.00002</b>   | < <b>0.00002</b>   | < <b>0.00002</b>            | < <b>0.00002</b>    | < <b>0.00002</b>            | 0.06  | 0.84  | 1.29  |
| Ribosome LSU Bacterial                           | 35      | < <b>0.00002</b>   | < <b>0.00002</b>   | < <b>0.00002</b>            | 0.00088             | < <b>0.00002</b>            | -0.77 | 0.45  | 1.42  |
| SPI 2                                            | 44      | < <b>0.00002</b>   | <b>0.00003</b>     | < <b>0.00002</b>            | 0.00084             | < <b>0.00002</b>            | -0.57 | -0.07 | 0.43  |
| <b>MgMshock hfq</b>                              |         |                    |                    |                             |                     |                             |       |       |       |
| Ribosome SSU Bacterial                           | 22      | 0.03235            | <b>0.00015</b>     | 0.00430                     | 0.00212             | 0.00030                     | -0.92 | -0.44 | -0.09 |
| Propanedial utilization                          | 25      | <b>0.00011</b>     | 0.00069            | 0.00056                     | 0.00620             | 0.00046                     | -0.90 | -0.16 | 0.26  |
| Transcription initiation bacterial sigma factors | 9       | <b>0.00012</b>     | <b>0.00018</b>     | 0.00660                     | 0.01436             | 0.00708                     | -0.06 | 0.53  | 0.90  |
| Phage shock protein (psp) operon                 | 6       | 0.17876            | 0.00106            | 0.01026                     | < <b>0.00002</b>    | 0.00166                     | 0.57  | 0.73  | 0.90  |

|                                   | Setsize | FET 1<br>(p-value) | FET ½<br>(p-value) | ABS-<br>SUM-NR<br>(p-value) | SUM-NR<br>(p-value) | MAXME<br>AN-NR<br>(p-value) | Q1    | Med   | Q3    |
|-----------------------------------|---------|--------------------|--------------------|-----------------------------|---------------------|-----------------------------|-------|-------|-------|
| <b>Salmonella<br/>Experiments</b> |         |                    |                    |                             |                     |                             |       |       |       |
| <b>MgM shock <i>smpB</i></b>      |         |                    |                    |                             |                     |                             |       |       |       |
| Ribosome SSU                      | 22      | <b>0.00005</b>     | 0.00251            | 0.00106                     | <b>0.00004</b>      | <b>&lt;0.00002</b>          | -1.20 | -0.48 | -0.04 |
| Bacterial                         |         |                    |                    |                             |                     |                             |       |       |       |
| SPI 2                             | 44      | <b>&lt;0.00002</b> | <b>&lt;0.00002</b> | <b>&lt;0.00002</b>          | 0.09992             | 0.00814                     | -0.37 | 0.10  | 0.49  |

\*Because of its large overlap with other gene sets, significance for the EGS prediction gene set is not included in this table.

#### *E coli Acetyl Phosphate Experiments*

1. ACP\_ACK\_AC\_V\_WT\_LO---ackA plus added acetate vs. wildtype
2. ACP\_ACK\_V\_ACK\_AC\_LO---ackA mutant vs ackA plus added acetate
3. ACP\_ACK\_V\_PTAACK\_LO---ackA mutant vs. pta-ackA mutant
4. ACP\_ACK\_V\_WT\_LO--ackA mutant vs. wildtype
5. ACP\_PTA\_V\_ACK\_AC\_LO---pta ackA mutant vs. ackA mutant plus added acetate
6. ACP\_PTA\_V\_WT\_LO---pta ackA mutant vs. wildtype

#### *E coli Sugar Acids experiments*

1. GNT\_V\_GLC----minimal gluconate vs. glucose in log phase
2. IDN\_GLC\_V\_GLC---minimal idonate plus glucose vs. glucose in log phase
3. IDN\_GNT\_V\_GLC---minimal idonate plus gluconate vs. glucose in log phase
4. IDN\_V\_GLC---minimal idonate vs. glucose in log phase
